# Supplementary material for: Allium sphaeronixum (Amaryllidaceae), A New Species from Turkey
Source: MDPI journal article supplement (doi:10.3390/plants12112074), 2023-05-23
Supplement: s1 [file s1]

## Supplementary Materials

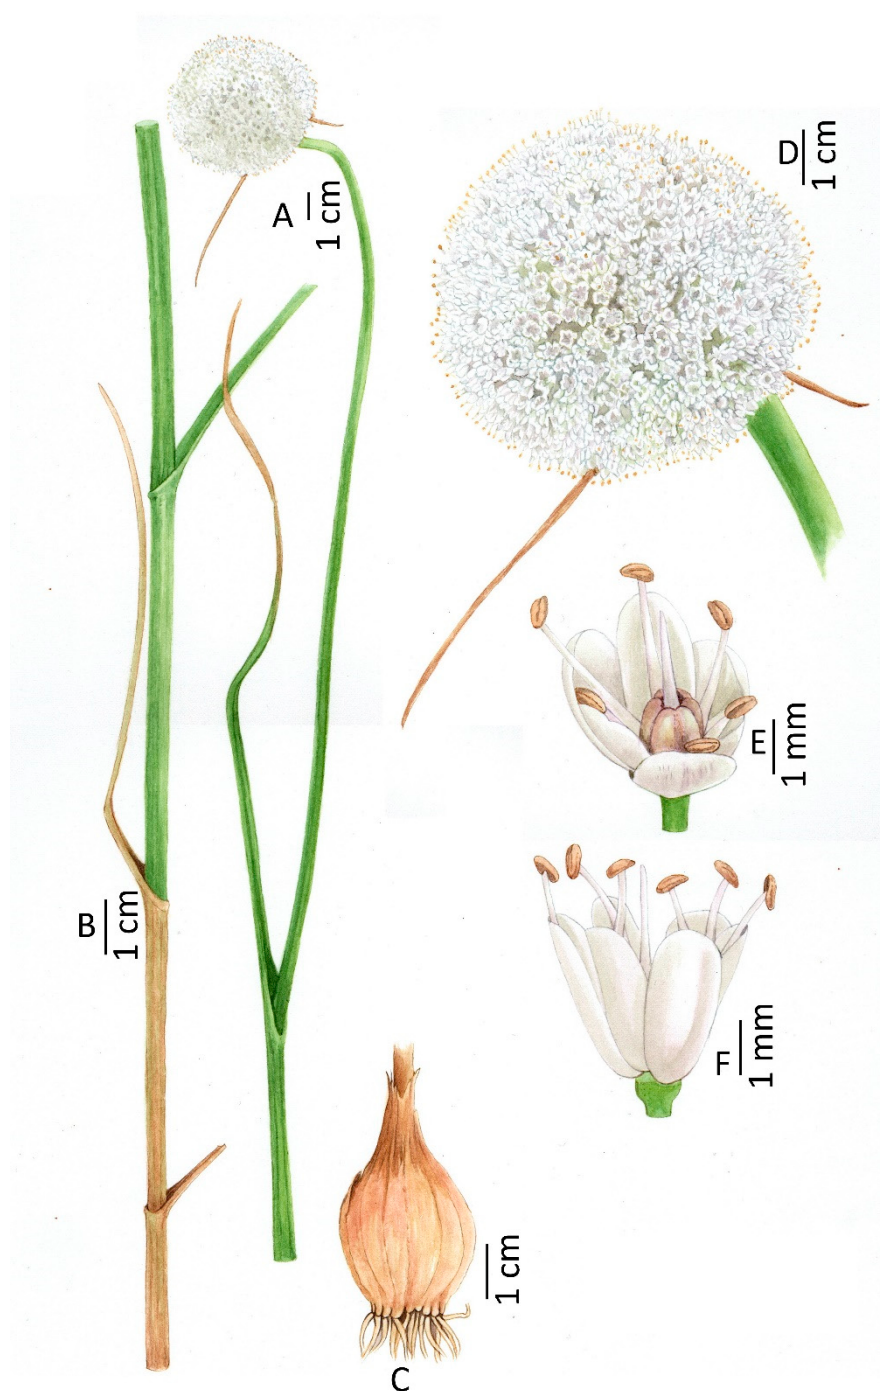

Figure S1. Colour plate with morphological details of *Allium sphaeronixum*. (A,B) General habit. (C) Bulb. (D) Inflorescence. (E) Stamens and pistil (F) Perigon.

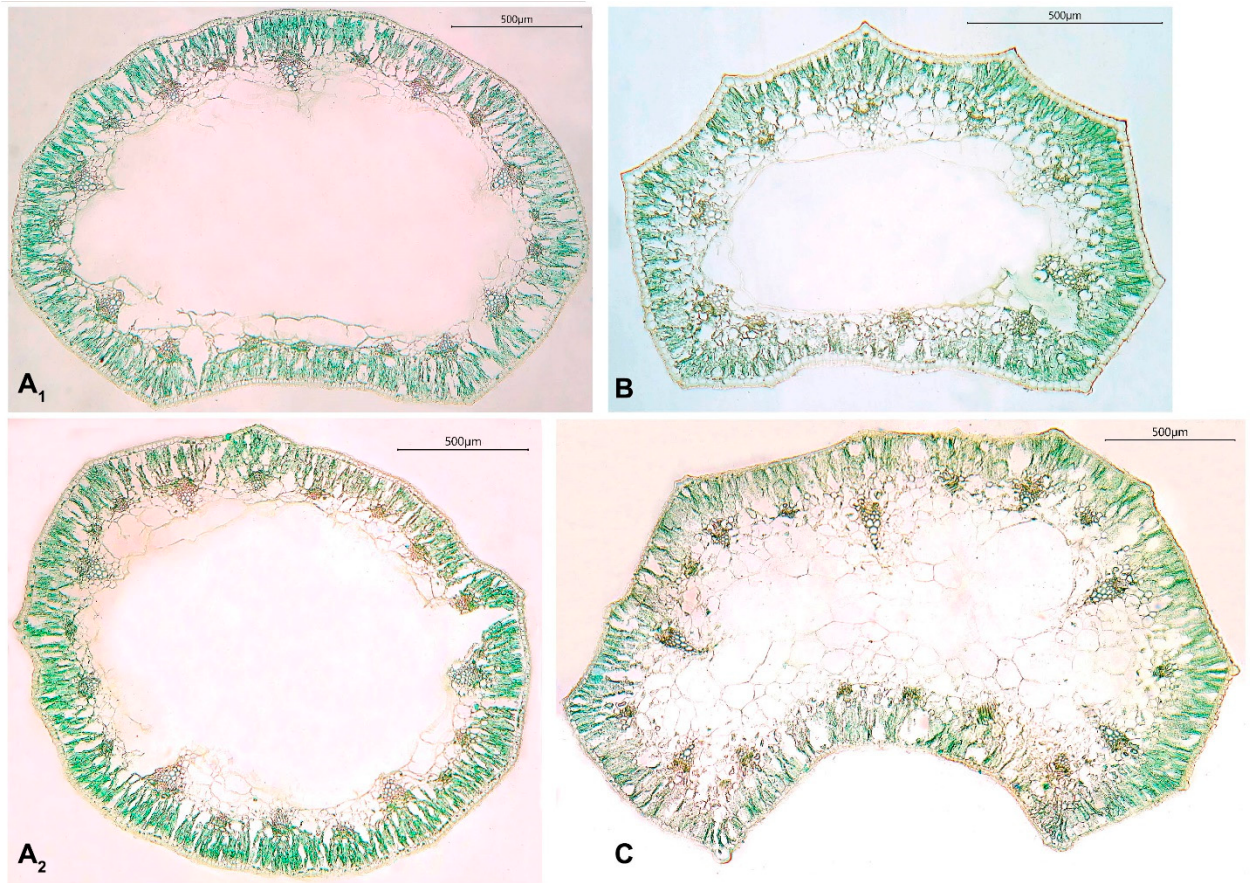

**Figure S2.** Colour plate of the leaf cross sections of *A. sphaeronixum* (A<sub>1</sub>, A<sub>2</sub>), *A. myrianthum* (B) and *A. staticiforme* (C).

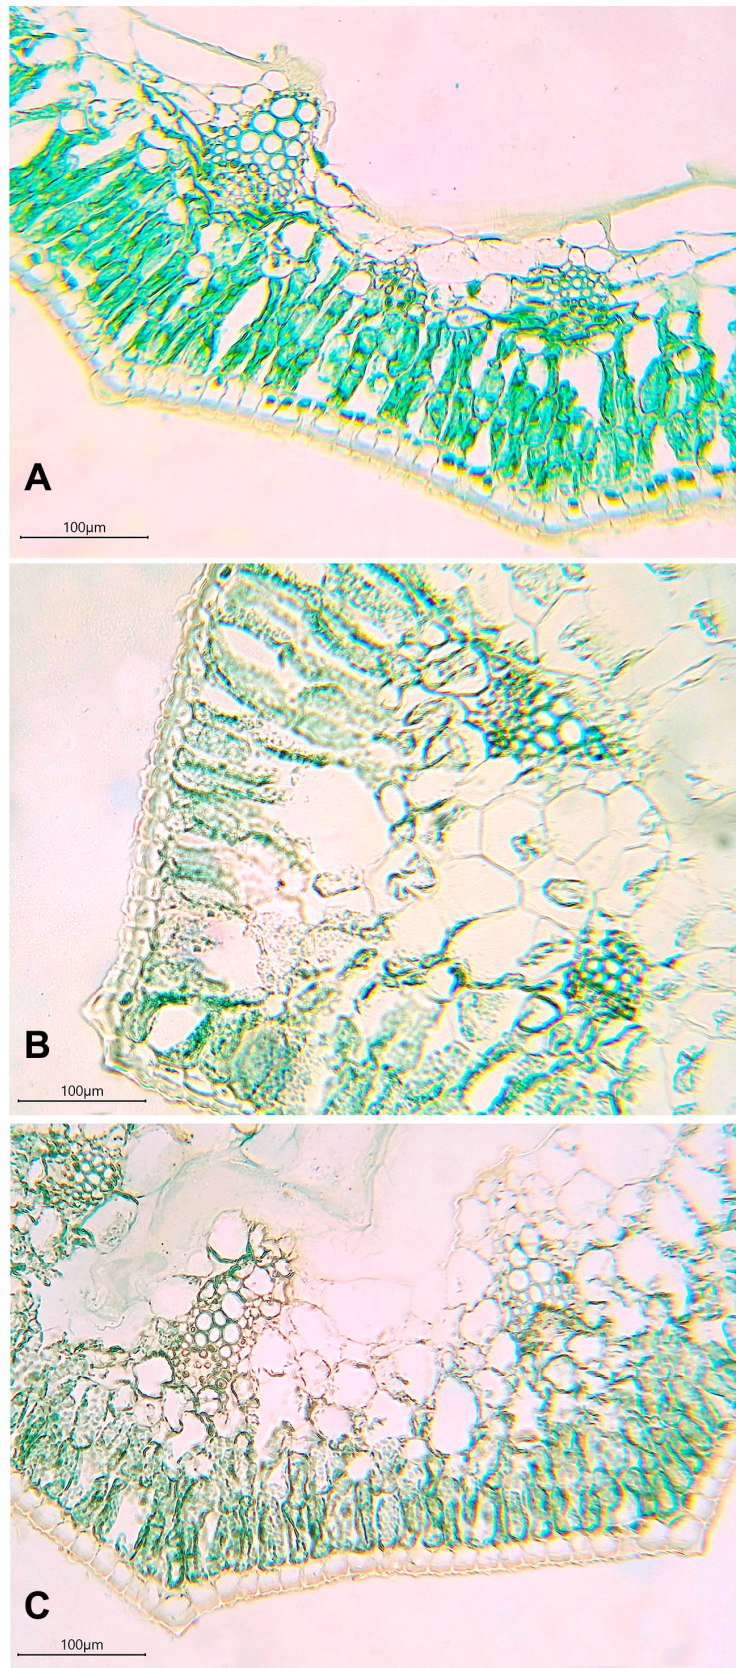

**Figure S3.** Details of mesophyll tissues from the leaf cross sections of *A. sphaeronixum* (A), *A. myrianthum* (B) and *A. staticiforme* (C).
